# Supplementary material for: Roles of small extracellular vesicles in the development, diagnosis and possible treatment strategies for hepatocellular carcinoma (Review)
Source: PubMed Central journal article supplement — Int J Oncol. 2022 Jun 7;61(2):91. doi: 10.3892/ijo.2022.5381 (PMC9262158; doi:10.3892/ijo.2022.5381), 2022-06-07
Supplement: Supplementary_Data.pdf [file Supplementary_Data.pdf]

**Table SI. Roles of sEVs in the initiation and development of HCC.**

| Type   | Molecule     | Function                                                | Signaling/target      | Isolation method                                                         | Year of publication | (Refs.) <sup>a</sup> |
|--------|--------------|---------------------------------------------------------|-----------------------|--------------------------------------------------------------------------|---------------------|----------------------|
| miRNAs | miR-150-3p↓  | Inhibits migration and invasion                         | PTEN                  | Total Exosome Isolation (Thermo Fisher Scientific, Inc.)                 | 2021                | (31)                 |
|        | miR-92b↑     | Impairs the functions of NK cell and promotes migration | CD69                  | ExoQuick Exosome Precipitation Solution (System Biosciences, Inc.)       | 2019                | (32)                 |
|        | miR-200b-3p↓ | Promotes angiogenesis                                   | ERG                   | Total Exosome Isolation (Thermo Fisher Scientific, Inc.)                 | 2020                | (33)                 |
|        | miR-32-5p↑   | Induces multidrug resistance, angiogenesis and EMT      | PI3K/Akt              | Ultracentrifugation                                                      | 2018                | (34)                 |
|        | miR-9-3p↓    | Promotes proliferation                                  | ERK/ HBGF-5           | Ultracentrifugation                                                      | 2018                | (35)                 |
|        | miR-93↑      | Promotes proliferation and invasion                     | TIMP2/TP53INP1/CDKN1A | Total exosome isolation kit (Thermo Fisher Scientific, Inc.)             | 2018                | (36)                 |
|        | miR-1290↑    | Promotes angiogenesis                                   | SMEK1                 | Exosome isolation reagent (Guangzhou RiboBio Co., Ltd.)                  | 2021                | (37)                 |
|        | miR-25-3p↑   | Promotes proliferation and migration                    | TCF21 and HHIP        | GST <sup>TM</sup> Exosome Isolation Reagent (Genesee Biotech, Co., Ltd.) | 2020                | (38)                 |
|        | miR-296↑     | Promotes lymphangiogenesis                              | EAG1/VEGFA            | Ultracentrifugation                                                      | 2019                | (39)                 |
|        | miR-490↑     | Promotes migration                                      | ERK1/2                | Total exosome isolation reagent (Carlsbad, CA, US)                       | 2017                | (40)                 |
|        | miR-378b↑    | Promotes proliferation and angiogenesis                 | TGFBR3                | ExoQuick Exosome Precipitation Solution (System Biosciences, Inc.)       | 2021                | (41)                 |

|         |                 |                                                                       |                        |                                                                                           |      |      |
|---------|-----------------|-----------------------------------------------------------------------|------------------------|-------------------------------------------------------------------------------------------|------|------|
|         | miR-103↑        | Promotes migration                                                    | VE-Cad/p 120/ZO-1      | Unknown                                                                                   | 2018 | (42) |
|         | miR-320a↓       | Promotes proliferation and migration                                  | PBX3-ERK1/2-CDK2       | Unknown                                                                                   | 2017 | (43) |
|         | miR-326↑        | Inhibits proliferation, migration and invasion;<br>promotes apoptosis | NF-κB                  | Exosomes separation kit (ExoEasy Maxi kit, Qiagen GmbH)                                   | 2020 | (44) |
|         | hsa-miR-24-3p↑  | Promotes EMT and migration                                            | TGFβ1                  | Total Exosome Isolation Reagent (Thermo Fisher Scientific, Inc.)                          | 2020 | (45) |
| lncRNA  | PCED1B-AS1↑     | Promotes immunosuppression                                            | PD-Ls                  | Unknown                                                                                   | 2021 | (46) |
|         | DLX6-AS1↑       | Promotes lung migration                                               | miR-15a-5p/CXCL17 axis | Exoquick-TC™ kit (EXOTC50A-1, System Biosciences, Inc.)                                   | 2021 | (47) |
|         | LINC00161↑      | Promotes angiogenesis and metastasis                                  | miR-590-3p/ROCK        | Total Exosome Isolation Kit (Invitrogen; Thermo Fisher Scientific, Inc.)                  | 2021 | (48) |
|         | SENP3-EIF4A1↑   | Promotes apoptosis, and inhibits invasion and migration               | ZFP36                  | ExoQuick™ (System Biosciences, Inc.)                                                      | 2020 | (49) |
|         | lncRNA ROR↑     | Inhibits apoptosis and promotes proliferation                         | Caspase-3/9            | Total Exosome Isolation Reagent (Thermo Fisher Scientific, Inc., #4478359)                | 2019 | (50) |
|         | lncRNA FAL1↑    | Promote proliferation and migration                                   | miR-1236               | ExoQuick TC™ (EXOQ20A-1, System Biosciences, Inc.)                                        | 2018 | (51) |
| circRNA | circRNA UHRF1↑  | Induces immunosuppression and resistance to anti-PD1 therapy          | TIM-3                  | ExoQuick Exosome Precipitation Solution (SBI System Biosciences, Inc.; cat. no. EXOQ5A-1) | 2020 | (52) |
|         | circRNA Cdr1as↑ | Promotes proliferation and migration                                  | miR-1270               | ExoQuick exosome precipitation                                                            | 2019 | (53) |

|         |                   |                                                           |                                   |                                                                                |      |      |
|---------|-------------------|-----------------------------------------------------------|-----------------------------------|--------------------------------------------------------------------------------|------|------|
|         |                   |                                                           |                                   | solution (System Biosciences, Inc.)                                            |      |      |
|         | circRNA<br>SORE↑  | Resistance to sorafenib                                   | YBX1                              | Unknown                                                                        | 2020 | (54) |
|         | hsa_circ_0004277↑ | Promotes proliferation, migration and EMT                 | ZO-1                              | ExoQuick exosome precipitation solution (System Biosciences, Inc.)             | 2020 | (55) |
|         | hsa_circ_0061395↑ | Promotes proliferation                                    | miR-877-5p/PIK3R3                 | ExoQuick exosome precipitation solution (System Biosciences, Inc.)             | 2021 | (56) |
|         | circRNA-ZNF652↑   | Promotes proliferation, migration and invasion            | miR-29a-3p/GUCD1                  | ExoQuick precipitation kit (System Biosciences, Inc.)                          | 2020 | (57) |
|         | circCMTM3↑        | Promotes tumorigenesis and angiogenesis                   | miR-3619-5p/SOX9                  | Exoquick Exosome Precipitation Kit (System Biosciences, Inc.)                  | 2021 | (58) |
|         | has_circ_0039411↑ | Promotes migration                                        | MMP2                              | Ultracentrifugation                                                            | 2020 | (59) |
|         | circPTGR1↑        | Promotes migration and invasion                           | miR449a-MET                       | ExoQuick-TC exosome precipitation solution (System Biosciences, Inc.)          | 2019 | (60) |
|         | hsa_circ_0051443↑ | Promotes apoptosis                                        | miR-331-3p                        | ExoQuick exosome precipitation solution (System Biosciences, Inc.)             | 2020 | (61) |
|         | circANTXR1↑       | Promotes proliferation, migration and invasion            | miR-532-5p/XRCC5                  | MagCapture™ Exosome Isolation Kit PS (FUJIFILM Wako Pure Chemical Corporation) | 2021 | (62) |
| Protein | ANGPT2↑           | Promotes angiogenesis                                     | AKT/eNOS or AKT/ $\beta$ -catenin | Ultracentrifugation                                                            | 2020 | (26) |
|         | CLEC3B↓           | Promotes migration, invasion and EMT of HCC cells and ECs | AMPK                              | ExoQuick-TC™ Exosome Precipitation Solution (System Biosciences, Inc.)         | 2019 | (63) |
|         | VASN↑             | Promote proliferation and metastasis                      | TGF- $\beta$                      | ExoQuick-TC™ Exosome Precipitation                                             | 2015 | (64) |

|  |               |                                                                |           |                                         |      |      |
|--|---------------|----------------------------------------------------------------|-----------|-----------------------------------------|------|------|
|  |               |                                                                |           | Solution (System Biosciences, Inc.)     |      |      |
|  | p120-catenin↑ | Suppresses proliferation and metastasis                        | STAT3     | Ultracentrifugation                     | 2019 | (65) |
|  | CXCR4↑        | Promotes migration, invasion and lymphangiogenesis             | MMPs      | ExoQuick-TC™ (System Biosciences, Inc.) | 2018 | (66) |
|  | SMO↑          | Promotes proliferation, migration, invasion and EMT            | Hedgehog  | Ultracentrifugation                     | 2021 | (67) |
|  | SMAD3↑        | Increases adhesive ability of HCC cells and promote metastasis | PTDEs/ROS | ExoQuick-TC™ (System Biosciences, Inc.) | 2018 | (68) |

<sup>a</sup>Please see the main manuscript for the references. Upward arrows (↑) indicate upregulation and downward arrows (↓) indicate downregulation. HCC, hepatocellular carcinoma; NK, natural killer; EMT, epithelial-mesenchymal transition; ECs, endothelial cells; PTEN, phosphatase and tensin homolog; ERG, erythroblast transformation-specific-related gene; PI3K, phosphatidylinositol-3-kinase; ERK, extracellular regulated protein kinases; HBGF-5, fibroblast growth factor 5; TIMP2, metalloproteinase inhibitor 2; TP53INP1, tumor protein p53 inducible nuclear protein 1; CDKN1A, cyclin-dependent kinase inhibitor 1A; SMEK1, suppressor of mitogen-activated protein kinase kinase 1; TCF21, transcription factor 21; HHIP, hedgehog-interacting protein; EAG1, ether a go go potassium channel 1; VEGFA, vascular endothelial growth factor A; TGFBR3, transforming growth factor β receptor III; VE-Cad/ p120/ ZO-1, VE-Cadherin/ p120-catenin/ zonula occludens 1; PBX3, pre-B-cell leukemia transcription factor 3; CDK2, cyclin-dependent kinase 2; NF-κB, nuclear factor kappa-B; TGF-β, transforming growth factor-β; PCED1B-AS1, PC-esterase domain containing 1B antisense RNA 1; PD-Ls, programmed cell death protein 1 ligands; DLX6-AS1, distal-less homeobox 6 antisense 1; CXCL17, C-X-C motif chemokine ligand 17; ROCK, rho-associated coiled-coil containing kinase; SENP3, SUMO-specific protease 3; EIF4A1, eukaryotic translation initiation factor 4A1; ZFP36, zinc finger protein 36; lncRNA ROR, long noncoding RNA regulator of reprogramming; UHRF1, ubiquitin like with PHD and ring finger domains 1; TIM-3, T cell immunoglobulin and mucin domain 3; circRNA SORE, circular RNA upregulated in sorafenib-resistant HCC cells; YBX1, Y-box binding protein 1; PIK3R3, phosphoinositide-3-kinase regulatory subunit 3; GUCD1, guanylyl cyclase domain containing 1; CMTM3, CKLF-like MARVEL transmembrane domain-containing 3; MMP2, matrix metalloproteinase 2; PTGR1, prostaglandin reductase 1; MET, mesenchymal-epithelial transition factor; ANTXR1, anthrax toxin receptor 1; XRCC5, X-ray repair cross-complementing protein 5; eNOS, endothelial nitric oxide synthase; CLEC3B, C-type lectin domain family 3 member B; AMPK, AMP-activated protein kinase; VASN, Vasorin; STAT, signal transducer

and activator of transcription; CXCR4, CXC chemokine receptor-4; SMO, smoothened; SMAD4, mothers against decapentaplegic homolog 4; PTDEs, primary tumor-derived exosomes; ROS, reactive oxygen species.
